# Supplementary material
Source: ML conference proceedings conference paper supplement (https://openaccess.thecvf.com/content/ICCV2021/html/Chen_Diverse_Image_Style_ICCV_2021_paper.html)
Supplement: Supplementary file 1 [file Chen_Diverse_Image_Style_ICCV_2021_supplemental.pdf]

# Diverse Image Style Transfer via Invertible Cross-Space Mapping

## - Supplementary Material -

Haibo Chen, Lei Zhao\*, Huiming Zhang, Zhizhong Wang  
Zhiwen Zuo, Ailin Li, Wei Xing\*, Dongming Lu

College of Computer Science and Technology, Zhejiang University

{cshbchen, cszh1, qinglanwuji, endywon, zzwcs, liailin, wxing, ldm}@zju.edu.cn

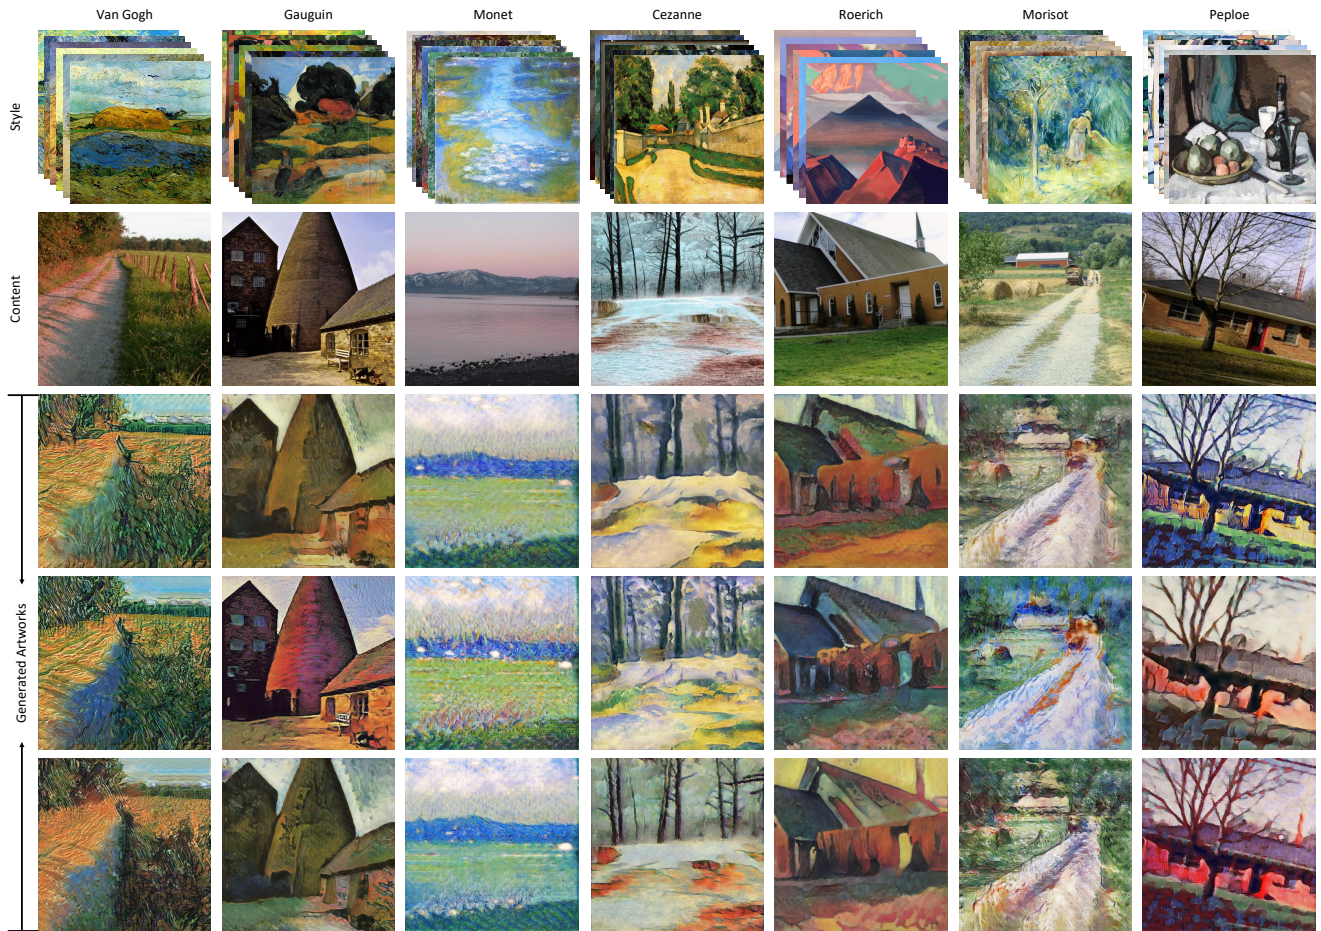

Figure 1: Stylization examples generated by DIST. The first row shows the artworks of different artists. The second row shows the content images. The other three rows show the diverse stylized images generated by our model.
